# Supplementary material
Source: ML conference proceedings conference paper supplement (https://proceedings.neurips.cc/paper_files/paper/2023/hash/2f4d6f8e0f4f543db12260696b2a3551-Abstract.html)
Supplement: Supplementary file 1 [file 2f4d6f8e0f4f543db12260696b2a3551-Supplemental-Conference.zip]

Archive with 7 entries (7 files):
- appendices.pdf
- cifar10.py
- cifar100.py
- compute.txt
- main.py
- mnist.py
- resnet_mods.py
