# Supplementary material
Source: ML conference proceedings conference paper supplement (https://proceedings.neurips.cc/paper_files/paper/2023/hash/2f4d6f8e0f4f543db12260696b2a3551-Abstract.html)
Supplement: Supplementary file 1 [file 2f4d6f8e0f4f543db12260696b2a3551-Supplemental-Conference.zip › compute.txt]

all experiments run on an RTX NVIDIA A6000
