# Supplementary material
Source: ML conference proceedings conference paper supplement (https://proceedings.neurips.cc/paper_files/paper/2023/hash/2f4d6f8e0f4f543db12260696b2a3551-Abstract.html)
Supplement: Supplementary file 1 [file 2f4d6f8e0f4f543db12260696b2a3551-Supplemental-Conference.zip › resnet_mods.py]

import torch
import torch.nn as nn
import torch.nn.functional as F
import torch.nn.init as init
import math
    
class ResConv(nn.Module):

    def __init__(self, res, *args, **kwargs):
        super().__init__()
        self.conv = nn.Conv2d(*args, **kwargs)
        self.res = res
        self.pool = nn.AvgPool2d(self.conv.stride, self.conv.stride)

    def forward(self, x):
        if self.res == True:
            out = self.conv.stride[0] * self.pool(x)
            out = F.pad(out, (0, 0, 0, 0, math.ceil((self.conv.out_channels - self.conv.in_channels) / 2), math.floor((self.conv.out_channels - self.conv.in_channels) / 2)), 'constant', 0)
            out = out + self.conv(x)
            return out
        else:
            return self.conv(x)


class PreActBlock(nn.Module):
    '''Pre-activation version of the BasicBlock.'''
    expansion = 1

    def __init__(self, res, in_planes, planes, stride=1):
        super(PreActBlock, self).__init__()
        self.bn1 = nn.BatchNorm2d(in_planes)
        self.conv1 = nn.Conv2d(in_planes, planes, kernel_size=3, stride=stride, padding=1, bias=False)
        self.bn2 = nn.BatchNorm2d(planes)
        self.conv2 = nn.Conv2d(planes, planes, kernel_size=3, stride=1, padding=1, bias=False)

        if stride != 1 or in_planes != self.expansion*planes:
            self.shortcut = nn.Sequential(
                ResConv(res, in_planes, self.expansion*planes, kernel_size=1, stride=stride, bias=False)
            )

    def forward(self, x):
        out = F.relu(self.bn1(x))
        shortcut = self.shortcut(out) if hasattr(self, 'shortcut') else x
        out = self.conv1(out)
        out = self.conv2(F.relu(self.bn2(out)))
        out += shortcut
        return out


class PreActBottleneck(nn.Module):
    '''Pre-activation version of the original Bottleneck module.'''
    expansion = 4

    def __init__(self, res, in_planes, planes, stride=1):
        super(PreActBottleneck, self).__init__()
        self.bn1 = nn.BatchNorm2d(in_planes)
        self.conv1 = nn.Conv2d(in_planes, planes, kernel_size=1, bias=False)
        self.bn2 = nn.BatchNorm2d(planes)
        self.conv2 = nn.Conv2d(planes, planes, kernel_size=3, stride=stride, padding=1, bias=False)
        self.bn3 = nn.BatchNorm2d(planes)
        self.conv3 = nn.Conv2d(planes, self.expansion*planes, kernel_size=1, bias=False)

        if stride != 1 or in_planes != self.expansion*planes:
            self.shortcut = nn.Sequential(
                ResConv(res, in_planes, self.expansion*planes, kernel_size=1, stride=stride, bias=False)
            )

    def forward(self, x):
        out = F.relu(self.bn1(x))
        shortcut = self.shortcut(out) if hasattr(self, 'shortcut') else x
        out = self.conv1(out)
        out = self.conv2(F.relu(self.bn2(out)))
        out = self.conv3(F.relu(self.bn3(out)))
        out += shortcut
        return out


class PreActResNet(nn.Module):
    def __init__(self, block, num_blocks, res = False, num_classes=100):
        super(PreActResNet, self).__init__()
        self.in_planes = 64

        self.conv1 = nn.Conv2d(3, 64, kernel_size=3, stride=1, padding=1, bias=False)
        self.layer1 = self._make_layer(res, block, 64, num_blocks[0], stride=1)
        self.layer2 = self._make_layer(res, block, 128, num_blocks[1], stride=2)
        self.layer3 = self._make_layer(res, block, 256, num_blocks[2], stride=2)
        self.layer4 = self._make_layer(res, block, 512, num_blocks[3], stride=2)
        self.linear = nn.Linear(512*block.expansion, num_classes)

    def _make_layer(self, res, block, planes, num_blocks, stride):
        strides = [stride] + [1]*(num_blocks-1)
        layers = []
        for stride in strides:
            layers.append(block(res, self.in_planes, planes, stride))
            self.in_planes = planes * block.expansion
        return nn.Sequential(*layers)

    def forward(self, x):
        out = self.conv1(x)
        out = self.layer1(out)
        out = self.layer2(out)
        out = self.layer3(out)
        out = self.layer4(out)
        out = F.avg_pool2d(out, 4)
        out = out.view(out.size(0), -1)
        out = self.linear(out)
        return out


def PreActResNet18(res, num_classes):
    return PreActResNet(PreActBlock, [2,2,2,2], res = res, num_classes = num_classes)

def PreActResNet34(res, num_classes):
    return PreActResNet(PreActBlock, [3,4,6,3], res = res, num_classes = num_classes)

def PreActResNet50(res, num_classes):
    return PreActResNet(PreActBottleneck, [3,4,6,3], res = res, num_classes = num_classes)

def PreActResNet101(res, num_classes):
    return PreActResNet(PreActBottleneck, [3,4,23,3], res = res, num_classes = num_classes)

def PreActResNet152(res, num_classes):
    return PreActResNet(PreActBottleneck, [3,8,36,3], res = res, num_classes = num_classes)
